# Supplementary material for: Using Landscape Analysis to Test Hypotheses about Drivers of Tick Abundance and Infection Prevalence with Borrelia burgdorferi
Source: MDPI journal article supplement (doi:10.3390/ijerph15040737), 2018-04-12

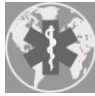

## Supplementary Materials: Using Landscape Analysis to Test Hypotheses about Drivers of Tick Abundance and Infection Prevalence with *Borrelia burgdorferi*

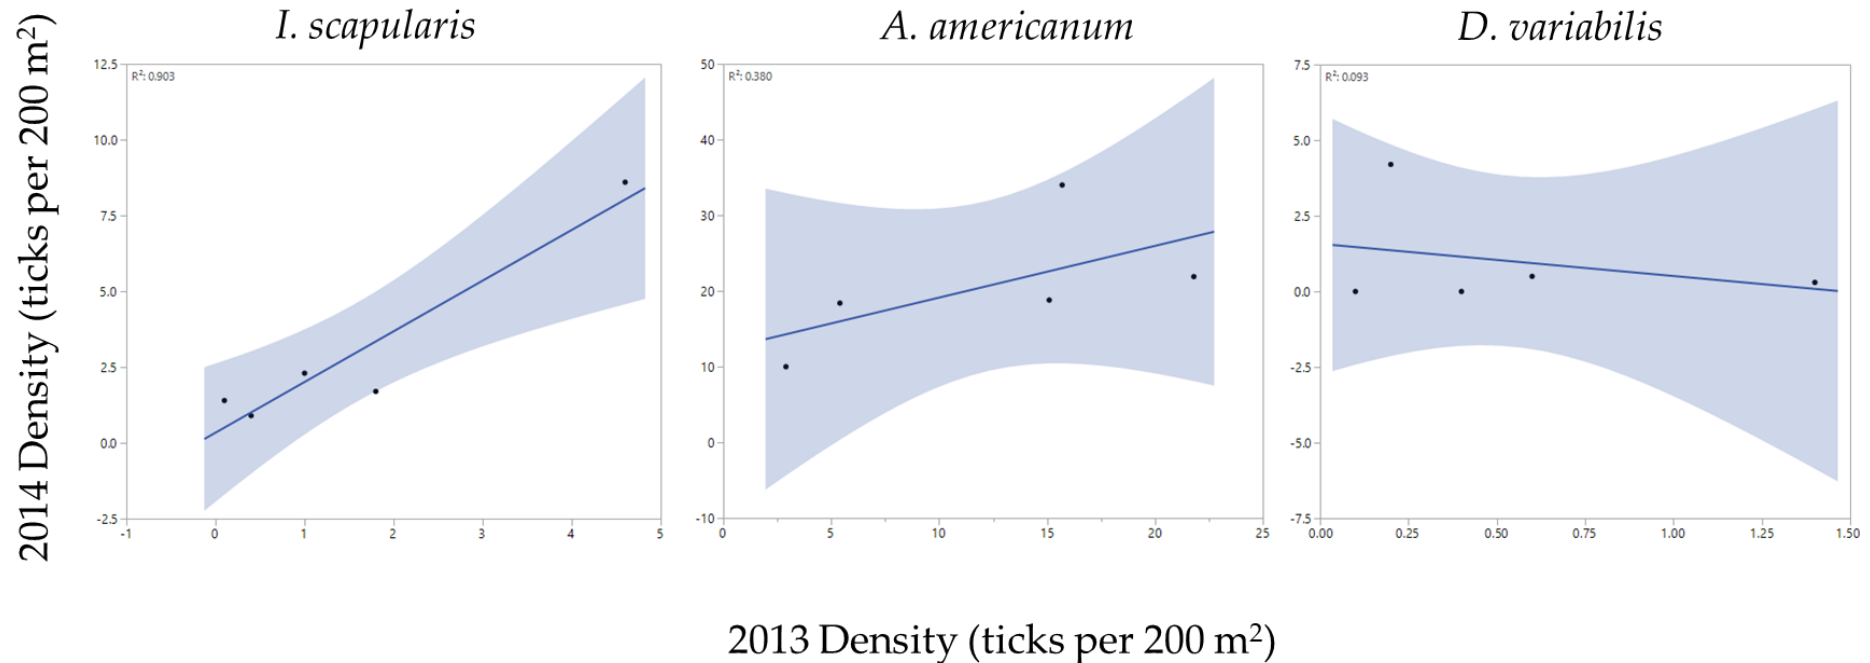

**Figure S1.** Abundance of each tick species in this studied at 5 sites samples in 2013 (x-axes) and 2014 (y-axes); shading represents 95% confidence interval around line of best fit. Sampling methodology was identical in both years. Abundance of *I. scapularis* in 2013 was significantly ( $r = 0.95$ ,  $P = 0.01$ ) correlated with abundance in 2014; no such relationship was found for *A. americanum* ( $r = 0.62$ ,  $P = 0.27$ ) or *D. variabilis* ( $r = -0.31$ ,  $P = 0.62$ ).

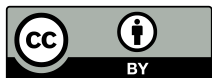

Supplement: s1 [file s1]
